# Supplementary material
Source: PubMed Central journal article supplement (PMC1895277)
Supplement: blood_2005-10-4160_1.pdf [file blood_2005-10-4160_1.pdf]

| Gene name<br>SNP database ID<br>(nucleotide change) | All NHL           |                |                        |              | B-cell lymphoma |                        |              | T-cell lymphoma |                        |                  |  |
|-----------------------------------------------------|-------------------|----------------|------------------------|--------------|-----------------|------------------------|--------------|-----------------|------------------------|------------------|--|
|                                                     | Controls<br>n (%) | Cases<br>n (%) | Odds ratio<br>(95% CI) | P-<br>Value  | Cases<br>n (%)  | Odds ratio<br>(95% CI) | P-<br>Value  | Cases<br>n (%)  | Odds ratio<br>(95% CI) | P-<br>Value      |  |
| <i>IL4</i> rs2243248 (-1098T>G)                     |                   |                |                        |              |                 |                        |              |                 |                        |                  |  |
| TT                                                  | 472 (89)          | 384 (83)       |                        |              | 315 (85)        |                        |              | 19 (63)         |                        |                  |  |
| GT or GG                                            | 58 (11)           | 76 (17)        | 1.62 (1.12-2.34)       | <b>0.01</b>  | 55 (15)         | 1.41 (0.95-2.1)        | 0.089        | 11 (37)         | 4.73 (2.14-10.46)      | <b>&lt;0.001</b> |  |
| <i>IL4R</i> rs2107356 (-28120C>T)                   |                   |                |                        |              |                 |                        |              |                 |                        |                  |  |
| CC                                                  | 173 (34)          | 137 (31)       |                        |              | 114 (33)        |                        |              | 6 (19)          |                        |                  |  |
| CT                                                  | 242 (48)          | 238 (54)       | 1.26 (0.95-1.68)       | 0.11         | 183 (52)        | 1.16 (0.85-1.58)       | 0.34         | 20 (63)         | 2.40 (0.94-6.11)       | 0.066            |  |
| TT                                                  | 91 (18)           | 62 (14)        | 0.85 (0.57-1.26)       | 0.41         | 52 (15)         | 0.85 (0.56-1.29)       | 0.45         | 6 (19)          | 1.90 (0.59-6.06)       | 0.28             |  |
| CT or TT                                            | 333 (66)          | 300 (69)       | 1.15 (0.87-1.51)       | 0.32         | 235 (67)        | 1.07 (0.80-1.44)       | 0.63         | 26 (81)         | 2.26 (0.91-5.60)       | 0.078            |  |
| Trend                                               |                   |                |                        | 0.81         |                 |                        | 0.70         |                 |                        | 0.21             |  |
| <i>IL5</i> rs2069812 (-745C>T)                      |                   |                |                        |              |                 |                        |              |                 |                        |                  |  |
| CC                                                  | 261 (51)          | 210 (47)       |                        |              | 164 (46)        |                        |              | 17 (55)         |                        |                  |  |
| CT                                                  | 219 (43)          | 190 (42)       | 1.08 (0.83-1.41)       | 0.56         | 153 (43)        | 1.12 (0.84-1.49)       | 0.45         | 12 (39)         | 0.84 (0.39-1.79)       | 0.64             |  |
| TT                                                  | 35 (7)            | 50 (11)        | 1.77 (1.11-2.84)       | <b>0.017</b> | 43 (12)         | 1.94 (1.19-3.16)       | <b>0.008</b> | 2 (6) §         |                        |                  |  |
| CT or TT                                            | 254 (49)          | 240 (53)       | 1.18 (0.91-1.52)       | 0.20         | 196 (54)        | 1.23 (0.94-1.61)       | 0.13         | 14 (45)         | 0.84 (0.41-1.75)       | 0.64             |  |
| Trend                                               |                   |                |                        | <b>0.045</b> |                 |                        | <b>0.022</b> |                 |                        |                  |  |
| <i>IL6</i> rs1800795 (-174 G>C)                     |                   |                |                        |              |                 |                        |              |                 |                        |                  |  |
| GG                                                  | 207 (38)          | 187 (39)       |                        |              | 143 (38)        |                        |              | 20 (59)         |                        |                  |  |
| CG                                                  | 253 (47)          | 223 (47)       | 0.97 (0.74-1.27)       | 0.84         | 176 (46)        | 1.00 (0.75-1.33)       | 0.98         | 13 (38)         | 0.52 (0.25-1.08)       | 0.078            |  |
| CC                                                  | 80 (15)           | 66 (14)        | 0.91 (0.62-1.33)       | 0.62         | 62 (16)         | 1.11 (0.75-1.65)       | 0.60         | 1 (3)           |                        |                  |  |
| CG or CC                                            | 333 (62)          | 289 (61)       | 0.96 (0.74-1.23)       | 0.73         | 238 (62)        | 1.02 (0.78-1.34)       | 0.86         | 14 (41)         | 0.43 (0.21-0.87)       | <b>0.018</b>     |  |
| Trend                                               |                   |                |                        | 0.64         |                 |                        | 0.67         |                 |                        |                  |  |
| <i>IL6</i> rs1800797 (-598G>A)                      |                   |                |                        |              |                 |                        |              |                 |                        |                  |  |
| GG                                                  | 199 (38)          | 186 (41)       |                        |              | 142 (39)        |                        |              | 20 (61)         |                        |                  |  |
| AG                                                  | 244 (47)          | 210 (46)       | 0.92 (0.70-1.21)       | 0.56         | 165 (45)        | 0.94 (0.70-1.26)       | 0.69         | 12 (36)         | 0.48 (0.23-1.02)       | 0.056            |  |
| AA                                                  | 80 (15)           | 63 (14)        | 0.84 (0.57-1.24)       | 0.38         | 60 (16)         | 1.04 (0.70-1.56)       | 0.83         | 1 (3)           |                        |                  |  |
| AG or AA                                            | 324 (62)          | 273 (59)       | 0.90 (0.70-1.17)       | 0.43         | 225 (61)        | 0.97 (0.73-1.27)       | 0.81         | 13 (39)         | 0.40 (0.19-0.81)       | <b>0.012</b>     |  |
| Trend                                               |                   |                |                        | 0.36         |                 |                        | 0.97         |                 |                        |                  |  |
| <i>IL10</i> rs1800871 (-819C>T)                     |                   |                |                        |              |                 |                        |              |                 |                        |                  |  |
| CC                                                  | 310 (59)          | 261 (57)       |                        |              | 202 (55)        |                        |              | 23 (72)         |                        |                  |  |
| CT                                                  | 189 (36)          | 173 (38)       | 1.08 (0.83-1.41)       | 0.55         | 148 (40)        | 1.19 (0.9-1.58)        | 0.22         | 7 (22)          | 0.50 (0.21-1.19)       | 0.12             |  |
| TT                                                  | 27 (5)            | 24 (5)         | 1.07 (0.6-1.91)        | 0.81         | 17 (5)          | 1.00 (0.53-1.88)       | 1.00         | 2 (6)           |                        |                  |  |
| CT or TT                                            | 216 (41)          | 197 (43)       | 1.08 (0.84-1.4)        | 0.54         | 165 (45)        | 1.17 (0.89-1.53)       | 0.26         | 9 (28)          | 0.56 (0.26-1.24)       | 0.15             |  |
| Trend                                               |                   |                |                        | 0.58         |                 |                        | 0.38         |                 |                        |                  |  |

|                                  |          |          |                  |               |          |                  |               |         |                  |      |
|----------------------------------|----------|----------|------------------|---------------|----------|------------------|---------------|---------|------------------|------|
| <i>IL10</i> rs1800872 (-592C>A)  |          |          |                  |               |          |                  |               |         |                  |      |
| CC                               | 314 (61) | 260 (58) |                  |               | 203 (56) |                  |               | 23 (70) |                  |      |
| AC                               | 170 (33) | 158 (35) | 1.13 (0.86-1.48) | 0.39          | 134 (37) | 1.22 (0.91-1.63) | 0.18          | 7 (21)  | 0.56 (0.24-1.34) | 0.19 |
| AA                               | 35 (7)   | 33 (7)   | 1.14 (0.69-1.90) | 0.60          | 25 (7)   | 1.12 (0.65-1.93) | 0.68          | 3 (9)   |                  |      |
| AC or AA                         | 205 (40) | 191 (42) | 1.13 (0.87-1.46) | 0.35          | 159 (44) | 1.20 (0.92-1.58) | 0.19          | 10 (30) | 0.67 (0.31-1.43) | 0.30 |
| Trend                            |          |          |                  | 0.38          |          |                  | 0.27          |         |                  | 0.55 |
| <i>IL10</i> rs1800896 (-1082A>G) |          |          |                  |               |          |                  |               |         |                  |      |
| AA                               | 164 (30) | 126 (27) |                  |               | 96 (25)  |                  |               | 10 (29) |                  |      |
| AG                               | 282 (52) | 241 (51) | 1.12 (0.84-1.50) | 0.44          | 195 (51) | 1.20 (0.88-1.64) | 0.26          | 17 (50) | 0.99 (0.44-2.22) | 0.99 |
| GG                               | 92 (17)  | 108 (23) | 1.52 (1.06-2.19) | <b>0.023</b>  | 90 (24)  | 1.67 (1.13-2.46) | <b>0.0093</b> | 7 (21)  | 1.24 (0.46-3.37) | 0.67 |
| AG or GG                         | 374 (70) | 349 (73) | 1.22 (0.93-1.61) | 0.16          | 285 (75) | 1.31 (0.98-1.77) | 0.07          | 24 (71) | 1.05 (0.49-2.26) | 0.89 |
| Trend                            |          |          |                  | <b>0.028</b>  |          |                  | <b>0.011</b>  |         |                  | 0.71 |
| <i>IL10</i> rs1800890 (-3575T>A) |          |          |                  |               |          |                  |               |         |                  |      |
| TT                               | 233 (43) | 172 (36) |                  |               | 135 (35) |                  |               | 14 (41) |                  |      |
| AT                               | 261 (48) | 232 (49) | 1.22 (0.93-1.58) | 0.15          | 187 (49) | 1.26 (0.95-1.67) | 0.11          | 15 (44) | 0.96 (0.45-2.04) | 0.92 |
| AA                               | 53 (10)  | 72 (15)  | 1.84 (1.23-2.77) | <b>0.0032</b> | 59 (15)  | 1.93 (1.25-2.96) | <b>0.0027</b> | 5 (15)  | 1.55 (0.54-4.51) | 0.42 |
| AT or AA                         | 314 (57) | 304 (64) | 1.32 (1.03-1.70) | <b>0.031</b>  | 246 (65) | 1.37 (1.05-1.80) | <b>0.022</b>  | 20 (59) | 1.06 (0.53-2.15) | 0.86 |
| Trend                            |          |          |                  | <b>0.0041</b> |          |                  | <b>0.0031</b> |         |                  | 0.58 |

\* Odds ratios adjusted for age.

§ Odds ratio not given for cells with less than 5 subjects.
