# Supplementary material
Source: PubMed Central journal article supplement (PMC1895277)
Supplement: blood_2005-10-4160_2.pdf [file blood_2005-10-4160_2.pdf]

| Gene name<br>SNP database ID<br>(nucleotide change) | Diffuse large B-cell lymphoma |                |                        |                  | Follicular     |                        |              |
|-----------------------------------------------------|-------------------------------|----------------|------------------------|------------------|----------------|------------------------|--------------|
|                                                     | Controls<br>n (%)             | Cases<br>n (%) | Odds ratio<br>(95% CI) | P-<br>Value      | Cases<br>n (%) | Odds ratio<br>(95% CI) | P-<br>Value  |
| <i>IL5</i> rs2069812 (-745C>T)                      |                               |                |                        |                  |                |                        |              |
| CC                                                  | 261 (51)                      | 56 (40)        |                        |                  | 45 (44)        |                        |              |
| CT                                                  | 219 (43)                      | 62 (44)        | 1.34 (0.89-2.00)       | 0.16             | 51 (50)        | 1.37 (0.88-2.13)       | 0.17         |
| TT                                                  | 35 (7)                        | 22 (16)        | 2.89 (1.57-5.32)       | <b>&lt;0.001</b> | 6 (6)          | 0.97 (0.38-2.46)       | 0.95         |
| CT or TT                                            | 254 (49)                      | 84 (60)        | 1.55 (1.06-2.28)       | <b>0.023</b>     | 57 (56)        | 1.31 (0.85-2.02)       | 0.22         |
| Trend                                               |                               |                |                        | <b>0.0016</b>    |                |                        | 0.40         |
| <i>IL10</i> rs1800871 (-819C>T)                     |                               |                |                        |                  |                |                        |              |
| CC                                                  | 310 (59)                      | 77 (53)        |                        |                  | 50 (48)        |                        |              |
| CT                                                  | 189 (36)                      | 60 (42)        | 1.28 (0.87-1.88)       | 0.21             | 50 (48)        | 1.64 (1.06-2.53)       | <b>0.026</b> |
| TT                                                  | 27 (5)                        | 7 (5)          | 1.07 (0.45-2.56)       | 0.88             | 5 (5)          | 1.22 (0.45-3.34)       | 0.70         |
| CT or TT                                            | 216 (41)                      | 67 (47)        | 1.25 (0.86-1.82)       | 0.24             | 55 (52)        | 1.59 (1.04-2.42)       | <b>0.032</b> |
| Trend                                               |                               |                |                        | 0.33             |                |                        | 0.073        |
| <i>IL10</i> rs1800872 (-592C>A)                     |                               |                |                        |                  |                |                        |              |
| CC                                                  | 314 (61)                      | 78 (55)        |                        |                  | 52 (50)        |                        |              |
| AC                                                  | 170 (33)                      | 56 (39)        | 1.33 (0.90-1.96)       | 0.16             | 43 (41)        | 1.54 (0.98-2.40)       | 0.06         |
| AA                                                  | 35 (7)                        | 8 (6)          | 0.92 (0.41-2.06)       | 0.83             | 10 (10)        | 1.76 (0.81-3.78)       | 0.15         |
| AC or AA                                            | 205 (40)                      | 64 (45)        | 1.26 (0.86-1.83)       | 0.23             | 53 (50)        | 1.57 (1.03-2.40)       | <b>0.036</b> |
| Trend                                               |                               |                |                        | 0.45             |                |                        | <b>0.039</b> |
| <i>IL10</i> rs1800896 (-1082A>G)                    |                               |                |                        |                  |                |                        |              |
| AA                                                  | 164 (30)                      | 37 (25)        |                        |                  | 30 (27)        |                        |              |
| AG                                                  | 282 (52)                      | 74 (50)        | 1.16 (0.75-1.81)       | 0.50             | 59 (52)        | 1.19 (0.74-1.94)       | 0.47         |
| GG                                                  | 92 (17)                       | 38 (26)        | 1.80 (1.07-3.03)       | <b>0.027</b>     | 24 (21)        | 1.42 (0.78-2.58)       | 0.25         |
| AG or GG                                            | 374 (70)                      | 112 (75)       | 1.32 (0.87-2.01)       | 0.19             | 83 (73)        | 1.25 (0.79-1.98)       | 0.34         |
| Trend                                               |                               |                |                        | <b>0.033</b>     |                |                        | 0.25         |
| <i>IL10</i> rs1800890 (-3575T>A)                    |                               |                |                        |                  |                |                        |              |
| TT                                                  | 233 (43)                      | 53 (36)        |                        |                  | 38 (34)        |                        |              |
| AT                                                  | 261 (48)                      | 72 (48)        | 1.21 (0.81-1.81)       | 0.34             | 57 (50)        | 1.41 (0.90-2.22)       | 0.13         |
| AA                                                  | 53 (10)                       | 24 (16)        | 1.94 (1.10-3.44)       | <b>0.022</b>     | 18 (16)        | 2.04 (1.08-3.87)       | <b>0.029</b> |
| AT or AA                                            | 314 (57)                      | 96 (64)        | 1.34 (0.92-1.95)       | 0.13             | 75 (66)        | 1.53 (0.99-2.35)       | <b>0.053</b> |
| Trend                                               |                               |                |                        | <b>0.033</b>     |                |                        | <b>0.023</b> |

\* Odds ratios adjusted for age.
