# Supplementary material
Source: PubMed Central journal article supplement (PMC1895277)
Supplement: blood_2005-10-4160_3.pdf [file blood_2005-10-4160_3.pdf]

| Gene name<br>SNP database ID<br>(nucleotide change) | All NHL           |                |                        |             | B cell lymphoma |                        |             | T cell lymphoma    |                        |             |
|-----------------------------------------------------|-------------------|----------------|------------------------|-------------|-----------------|------------------------|-------------|--------------------|------------------------|-------------|
|                                                     | Controls<br>n (%) | Cases<br>n (%) | Odds ratio<br>(95% CI) | P-<br>Value | Cases<br>n (%)  | Odds ratio<br>(95% CI) | P-<br>Value | Cases<br>n (%)     | Odds ratio<br>(95% CI) | P-<br>Value |
| <b>Th1 genes</b>                                    |                   |                |                        |             |                 |                        |             |                    |                        |             |
| <i>IFNG</i> s1861494 (IVS3+284G>A)                  |                   |                |                        |             |                 |                        |             |                    |                        |             |
| AA                                                  | 275 (51)          | 248 (54)       |                        |             | 201 (55)        |                        |             | 13 (39)            |                        |             |
| AG                                                  | 210 (39)          | 171 (37)       | 0.89 (0.68-1.16)       | 0.38        | 132 (36)        | 0.84 (0.63-1.12)       | 0.23        | 18 (55)            | 1.91 (0.90-4.02)       | 0.091       |
| GG                                                  | 50 (9)            | 40 (9)         | 0.91 (0.58-1.43)       | 0.67        | 35 (10)         | 0.98 (0.61-1.57)       | 0.92        | 2 (6) <sup>§</sup> |                        |             |
| AG or GG                                            | 260 (49)          | 211 (46)       | 0.89 (0.69-1.15)       | 0.37        | 167 (45)        | 0.87 (0.66-1.13)       | 0.29        | 20 (61)            | 1.71 (0.82-3.54)       | 0.15        |
| Trend                                               |                   |                |                        | 0.44        |                 |                        | 0.48        |                    |                        |             |
| <i>IFNG</i> rs2069705 (-1615C>T)                    |                   |                |                        |             |                 |                        |             |                    |                        |             |
| TT                                                  | 234 (44)          | 208 (45)       |                        |             | 171 (47)        |                        |             | 12 (36)            |                        |             |
| CT                                                  | 233 (44)          | 194 (42)       | 0.93 (0.71-1.21)       | 0.58        | 151 (41)        | 0.88 (0.66-1.17)       | 0.38        | 16 (48)            | 1.31 (0.60-2.84)       | 0.50        |
| CC                                                  | 65 (12)           | 56 (12)        | 1.01 (0.67-1.52)       | 0.97        | 45 (12)         | 0.99 (0.64-1.53)       | 0.98        | 5 (15)             | 1.50 (0.50-4.45)       | 0.47        |
| CT or CC                                            | 298 (56)          | 250 (55)       | 0.94 (0.73-1.22)       | 0.66        | 196 (53)        | 0.90 (0.69-1.18)       | 0.46        | 21 (64)            | 1.35 (0.65-2.81)       | 0.42        |
| Trend                                               |                   |                |                        | 0.83        |                 |                        | 0.68        |                    |                        | 0.40        |
| <i>IFNGR1</i> rs3799488 (IVS6-4G>A)                 |                   |                |                        |             |                 |                        |             |                    |                        |             |
| AA                                                  | 413 (77)          | 358 (79)       |                        |             | 287 (79)        |                        |             | 28 (85)            |                        |             |
| AG                                                  | 114 (21)          | 92 (20)        | 0.95 (0.69-1.30)       | 0.74        | 73 (20)         | 0.93 (0.66-1.29)       | 0.66        | 5 (15)             | 0.67 (0.25-1.77)       | 0.42        |
| GG                                                  | 8 (2)             | 6 (1)          | 0.83 (0.29-2.43)       | 0.74        | 5 (1)           | 0.86 (0.28-2.68)       | 0.80        | 0 (0)              |                        |             |
| AG or GG                                            | 122 (23)          | 98 (21)        | 0.94 (0.69-1.28)       | 0.70        | 78 (21)         | 0.92 (0.67-1.28)       | 0.63        | 5 (15)             | 0.62 (0.23-1.66)       | 0.34        |
| Trend                                               |                   |                |                        | 0.66        |                 |                        | 0.62        |                    |                        |             |
| <i>IFNGR2</i> rs2070385 (Q64R Ex2-16A>G)            |                   |                |                        |             |                 |                        |             |                    |                        |             |
| AA                                                  | 436 (77)          | 382 (79)       |                        |             | 307 (79)        |                        |             | 26 (72)            |                        |             |
| AG                                                  | 120 (21)          | 94 (19)        | 0.91 (0.67-1.24)       | 0.57        | 76 (20)         | 0.93 (0.67-1.28)       | 0.65        | 9 (25)             | 1.2 (0.54-2.66)        | 0.66        |
| GG                                                  | 11 (2)            | 9 (2)          | 1.03 (0.41-2.57)       | 0.95        | 6 (2)           | 0.88 (0.32-2.46)       | 0.81        | 1 (3)              |                        |             |
| AG or GG                                            | 131 (23)          | 103 (21)       | 0.92 (0.69-1.24)       | 0.60        | 82 (21)         | 0.92 (0.67-1.27)       | 0.62        | 10 (28)            | 1.22 (0.56-2.64)       | 0.62        |
| Trend                                               |                   |                |                        | 0.66        |                 |                        | 0.62        |                    |                        |             |
| <i>IFNGR2</i> rs1059293 (Ex7-128C>T)                |                   |                |                        |             |                 |                        |             |                    |                        |             |
| CC                                                  | 173 (32)          | 132 (29)       |                        |             | 104 (28)        |                        |             | 14 (42)            |                        |             |
| CT                                                  | 252 (47)          | 232 (51)       | 1.21 (0.90-1.61)       | 0.21        | 183 (50)        | 1.21 (0.89-1.66)       | 0.22        | 15 (45)            | 0.74 (0.35-1.58)       | 0.44        |
| TT                                                  | 110 (21)          | 94 (21)        | 1.17 (0.81-1.67)       | 0.41        | 80 (22)         | 1.28 (0.87-1.88)       | 0.20        | 4 (13)             |                        |             |
| CT or TT                                            | 362 (68)          | 326 (71)       | 1.19 (0.91-1.57)       | 0.20        | 263 (72)        | 1.23 (0.92-1.65)       | 0.16        | 19 (58)            | 0.65 (0.32-1.33)       | 0.24        |
| Trend                                               |                   |                |                        | 0.33        |                 |                        | 0.18        |                    |                        |             |

|                                     |          |          |                  |       |          |                  |              |         |                  |              |
|-------------------------------------|----------|----------|------------------|-------|----------|------------------|--------------|---------|------------------|--------------|
| <i>IL2</i> rs2069762 (IVS1-100G>T)  |          |          |                  |       |          |                  |              |         |                  |              |
| TT                                  | 296 (51) | 231 (46) |                  |       | 182 (46) |                  |              |         | 23 (61)          |              |
| GT                                  | 226 (39) | 214 (43) | 1.23 (0.95-1.59) | 0.12  | 170 (43) | 1.21 (0.92-1.59) | 0.17         | 14 (37) | 0.83 (0.41-1.66) | 0.59         |
| GG                                  | 53 (9)   | 57 (11)  | 1.37 (0.90-2.07) | 0.14  | 48 (12)  | 1.43 (0.93-2.21) | 0.11         | 1 (2)   |                  |              |
| GT or GG                            | 279 (49) | 271 (54) | 1.25 (0.98-1.60) | 0.068 | 218 (55) | 1.25 (0.97-1.62) | 0.085        | 15 (39) | 0.72 (0.36-1.43) | 0.35         |
| Trend                               |          |          |                  | 0.062 |          |                  | 0.061        |         |                  |              |
| <i>IL7R</i> rs1494555 (Ex4+33G>A)   |          |          |                  |       |          |                  |              |         |                  |              |
| AA                                  | 245 (46) | 205 (45) |                  |       | 171 (47) |                  |              | 9 (28)  |                  |              |
| AG                                  | 220 (41) | 204 (45) | 1.09 (0.83-1.42) | 0.55  | 163 (45) | 1.04 (0.78-1.38) | 0.80         | 19 (59) | 2.48 (1.08-5.73) | <b>0.033</b> |
| GG                                  | 67 (13)  | 43 (10)  | 0.76 (0.49-1.16) | 0.20  | 29 (8)   | 0.61 (0.38-0.99) | <b>0.046</b> | 4 (13)  |                  |              |
| AG or GG                            | 287 (54) | 247 (55) | 1.01 (0.78-1.30) | 0.94  | 192 (53) | 0.94 (0.72-1.23) | 0.66         | 23 (72) | 2.32 (1.03-5.25) | <b>0.042</b> |
| Trend                               |          |          |                  | 0.50  |          |                  | 0.18         |         |                  |              |
| <i>IL12A</i> rs568408 (Ex7+277A>G)  |          |          |                  |       |          |                  |              |         |                  |              |
| GG                                  | 423 (73) | 361 (73) |                  |       | 286 (73) |                  |              | 27 (71) |                  |              |
| AG                                  | 141 (24) | 127 (26) | 1.08 (0.82-1.43) | 0.60  | 99 (25)  | 1.07 (0.79-1.45) | 0.65         | 11 (29) | 1.22 (0.59-2.54) | 0.59         |
| AA                                  | 18 (3)   | 8 (2)    | 0.52 (0.22-1.22) | 0.13  | 7 (2)    | 0.61 (0.25-1.50) | 0.28         | 0 (0)   |                  |              |
| AG or AA                            | 159 (27) | 135 (27) | 1.02 (0.77-1.33) | 0.91  | 106 (27) | 1.02 (0.76-1.37) | 0.89         | 11 (29) | 1.08 (0.52-2.24) | 0.84         |
| Trend                               |          |          |                  | 0.71  |          |                  | 0.82         |         |                  |              |
| <i>IL12A</i> rs582054 (IVS2-798A>T) |          |          |                  |       |          |                  |              |         |                  |              |
| TT                                  | 171 (32) | 136 (30) |                  |       | 111 (30) |                  |              | 12 (36) |                  |              |
| AT                                  | 257 (48) | 225 (49) | 1.09 (0.82-1.46) | 0.56  | 180 (49) | 1.07 (0.79-1.46) | 0.66         | 16 (48) | 0.89 (0.41-1.93) | 0.76         |
| AA                                  | 106 (20) | 96 (21)  | 1.14 (0.80-1.63) | 0.47  | 76 (21)  | 1.10 (0.75-1.61) | 0.64         | 5 (15)  | 0.69 (0.24-2.03) | 0.50         |
| AT or AA                            | 363 (68) | 321 (70) | 1.10 (0.84-1.45) | 0.48  | 256 (70) | 1.08 (0.81-1.44) | 0.61         | 21 (64) | 0.83 (0.40-1.74) | 0.62         |
| Trend                               |          |          |                  | 0.46  |          |                  | 0.62         |         |                  | 0.51         |
| <i>IL12B</i> rs3212227 (Ex8+159A>C) |          |          |                  |       |          |                  |              |         |                  |              |
| AA                                  | 368 (65) | 301 (63) |                  |       | 238 (62) |                  |              | 27 (79) |                  |              |
| AC                                  | 178 (31) | 154 (32) | 1.07 (0.82-1.39) | 0.63  | 127 (33) | 1.12 (0.85-1.49) | 0.42         | 5 (15)  | 0.39 (0.15-1.03) | 0.057        |
| CC                                  | 23 (4)   | 24 (5)   | 1.25 (0.69-2.27) | 0.46  | 19 (5)   | 1.28 (0.68-2.41) | 0.45         | 2 (6)   |                  |              |
| AC or CC                            | 201 (35) | 178 (37) | 1.09 (0.84-1.41) | 0.51  | 146 (38) | 1.14 (0.87-1.50) | 0.34         | 7 (21)  | 0.47 (0.20-1.1)  | 0.081        |
| Trend                               |          |          |                  | 0.43  |          |                  | 0.30         |         |                  |              |

*IL15* rs10833 (Ex9-66T>C)

|          |          |          |                  |      |          |                  |      |         |                  |      |  |
|----------|----------|----------|------------------|------|----------|------------------|------|---------|------------------|------|--|
| CC       | 236 (44) | 201 (44) |                  |      | 162 (44) |                  |      |         | 14 (42)          |      |  |
| CT       | 230 (43) | 203 (44) | 1.00 (0.76-1.31) | 0.99 | 158 (43) | 0.96 (0.71-1.28) | 0.76 | 16 (48) | 1.19 (0.56-2.56) | 0.65 |  |
| TT       | 69 (13)  | 53 (12)  | 0.86 (0.57-1.30) | 0.48 | 46 (13)  | 0.91 (0.59-1.40) | 0.67 | 3 (10)  |                  |      |  |
| CT or TT | 299 (56) | 256 (56) | 0.97 (0.75-1.25) | 0.79 | 204 (56) | 0.95 (0.72-1.24) | 0.69 | 19 (58) | 1.09 (0.52-2.28) | 0.81 |  |
| Trend    |          |          |                  | 0.58 |          |                  | 0.65 |         |                  |      |  |

*IL15RA* rs2296135 (Ex8-361T>G)

|          |          |          |                  |      |          |                  |      |         |                  |      |  |
|----------|----------|----------|------------------|------|----------|------------------|------|---------|------------------|------|--|
| GG       | 151 (28) | 113 (25) |                  |      | 93 (25)  |                  |      |         | 10 (31)          |      |  |
| GT       | 250 (47) | 228 (50) | 1.19 (0.88-1.61) | 0.27 | 177 (48) | 1.11 (0.80-1.53) | 0.54 | 17 (53) | 1.06 (0.47-2.39) | 0.90 |  |
| TT       | 130 (24) | 114 (25) | 1.16 (0.81-1.65) | 0.41 | 95 (26)  | 1.16 (0.80-1.69) | 0.43 | 5 (16)  | 0.62 (0.20-1.87) | 0.39 |  |
| GT or TT | 380 (72) | 342 (75) | 1.18 (0.88-1.57) | 0.26 | 272 (75) | 1.13 (0.83-1.53) | 0.45 | 22 (69) | 0.91 (0.42-1.99) | 0.82 |  |
| Trend    |          |          |                  | 0.40 |          |                  | 0.43 |         |                  | 0.45 |  |

*LTA* rs909253 (IVS1+90G>A)

|          |          |          |                  |      |          |                  |      |         |                  |      |  |
|----------|----------|----------|------------------|------|----------|------------------|------|---------|------------------|------|--|
| AA       | 274 (46) | 240 (46) |                  |      | 197 (48) |                  |      |         | 21 (54)          |      |  |
| AG       | 254 (43) | 218 (42) | 0.98 (0.76-1.26) | 0.86 | 170 (41) | 0.94 (0.71-1.22) | 0.63 | 12 (31) | 0.58 (0.27-1.21) | 0.15 |  |
| GG       | 65 (11)  | 59 (11)  | 1.05 (0.71-1.56) | 0.80 | 44 (11)  | 0.96 (0.62-1.46) | 0.83 | 6 (15)  | 1.33 (0.51-3.46) | 0.56 |  |
| AG or GG | 319 (54) | 277 (54) | 0.99 (0.78-1.26) | 0.95 | 214 (52) | 0.94 (0.73-1.21) | 0.63 | 18 (46) | 0.72 (0.37-1.39) | 0.32 |  |
| Trend    |          |          |                  | 0.92 |          |                  | 0.69 |         |                  | 0.81 |  |

*LTA* rs2239704 (Ex1+49C>A)

|          |          |          |                  |      |          |                  |      |         |                  |       |  |
|----------|----------|----------|------------------|------|----------|------------------|------|---------|------------------|-------|--|
| CC       | 186 (37) | 165 (40) |                  |      | 130 (39) |                  |      |         | 14 (50)          |       |  |
| AC       | 226 (45) | 189 (45) | 0.92 (0.69-1.23) | 0.59 | 151 (45) | 0.94 (0.7-1.28)  | 0.72 | 8 (29)  | 0.42 (0.17-1.04) | 0.062 |  |
| AA       | 87 (17)  | 63 (15)  | 0.82 (0.56-1.21) | 0.33 | 51 (15)  | 0.84 (0.56-1.28) | 0.42 | 6 (21)  | 0.92 (0.34-2.50) | 0.88  |  |
| AC or AA | 313 (63) | 252 (60) | 0.90 (0.68-1.17) | 0.42 | 202 (61) | 0.92 (0.69-1.22) | 0.55 | 14 (50) | 0.56 (0.26-1.20) | 0.13  |  |
| Trend    |          |          |                  | 0.32 |          |                  | 0.43 |         |                  | 0.49  |  |

*TNF* rs1800629 (-308G>A)

|          |          |          |                  |      |          |                  |      |        |                  |      |  |
|----------|----------|----------|------------------|------|----------|------------------|------|--------|------------------|------|--|
| GG       | 430 (72) | 360 (70) |                  |      | 285 (70) |                  |      |        | 32 (84)          |      |  |
| AG       | 146 (25) | 140 (27) | 1.15 (0.88-1.51) | 0.32 | 112 (27) | 1.16 (0.87-1.55) | 0.31 | 6 (16) | 0.57 (0.23-1.40) | 0.22 |  |
| AA       | 19 (3)   | 13 (3)   | 0.80 (0.39-1.65) | 0.54 | 11 (3)   | 0.84 (0.39-1.80) | 0.65 | 0 (0)  |                  |      |  |
| AG or AA | 165 (28) | 153 (30) | 1.11 (0.85-1.44) | 0.44 | 123 (30) | 1.12 (0.85-1.49) | 0.41 | 6 (16) | 0.51 (0.21-1.24) | 0.14 |  |
| Trend    |          |          |                  | 0.66 |          |                  | 0.60 |        |                  |      |  |

*TNF* rs361525 (-417A>G)

|          |          |          |                 |      |          |                  |      |         |
|----------|----------|----------|-----------------|------|----------|------------------|------|---------|
| GG       | 492 (88) | 425 (90) |                 |      | 338 (89) |                  |      | 29 (88) |
| AG       | 60 (11)  | 46 (10)  | 0.91 (0.6-1.37) | 0.64 | 39 (10)  | 0.96 (0.62-1.48) | 0.85 | 4 (12)  |
| AA       | 5 (1)    | 3 (0)    |                 |      | 3 (1)    |                  |      |         |
| AG or AA | 65 (12)  | 49 (10)  | 0.89 (0.6-1.32) | 0.55 | 41 (11)  | 0.93 (0.61-1.41) | 0.72 | 4 (12)  |

*TNF* rs1799724 (-1036C>T)

|          |          |          |                  |      |          |                  |      |         |                  |      |
|----------|----------|----------|------------------|------|----------|------------------|------|---------|------------------|------|
| CC       | 431 (78) | 363 (76) |                  |      | 295 (77) |                  |      | 26 (79) |                  |      |
| CT       | 119 (21) | 110 (23) | 1.10 (0.82-1.47) | 0.54 | 84 (22)  | 1.04 (0.76-1.43) | 0.82 | 6 (18)  | 0.82 (0.33-2.04) | 0.67 |
| TT       | 6 (1)    | 4 (1)    |                  |      | 3 (1)    |                  |      | 1 (3)   |                  |      |
| CT or TT | 125 (22) | 114 (24) | 1.08 (0.81-1.45) | 0.60 | 87 (23)  | 1.02 (0.75-1.40) | 0.88 | 7 (21)  | 0.91 (0.38-2.15) | 0.83 |

**Th2 genes***IL4* rs2243250 (-588C>T)

|          |          |          |                  |      |          |                  |      |         |                  |      |
|----------|----------|----------|------------------|------|----------|------------------|------|---------|------------------|------|
| CC       | 413 (71) | 350 (70) |                  |      | 276 (70) |                  |      | 28 (76) |                  |      |
| CT       | 140 (24) | 132 (27) | 1.13 (0.85-1.50) | 0.39 | 107 (27) | 1.19 (0.88-1.60) | 0.26 | 8 (22)  | 0.76 (0.33-1.75) | 0.52 |
| TT       | 26 (4)   | 16 (3)   | 0.72 (0.37-1.43) | 0.35 | 12 (3)   | 0.79 (0.38-1.65) | 0.53 | 1 (2)   |                  |      |
| CT or TT | 166 (29) | 148 (30) | 1.08 (0.82-1.41) | 0.59 | 119 (30) | 1.14 (0.85-1.51) | 0.39 | 9 (24)  | 0.69 (0.30-1.58) | 0.39 |
| Trend    |          |          |                  | 0.94 |          |                  |      |         |                  | 0.65 |

*IL4* rs2070874 (Ex1-168C>T)

|          |          |          |                  |       |          |                  |      |         |                  |      |
|----------|----------|----------|------------------|-------|----------|------------------|------|---------|------------------|------|
| CC       | 419 (73) | 348 (71) |                  |       | 274 (71) |                  |      | 27 (75) |                  |      |
| CT       | 130 (23) | 129 (26) | 1.22 (0.91-1.62) | 0.18  | 106 (27) | 1.29 (0.95-1.75) | 0.10 | 9 (25)  | 0.98 (0.44-2.19) | 0.96 |
| TT       | 26 (5)   | 10 (2)   | 0.48 (0.22-1.02) | 0.056 | 8 (2)    | 0.51 (0.23-1.17) | 0.11 | 0 (0)   |                  |      |
| CT or TT | 156 (27) | 139 (29) | 1.10 (0.84-1.45) | 0.50  | 114 (29) | 1.17 (0.88-1.57) | 0.28 | 9 (25)  | 0.82 (0.36-1.83) | 0.62 |
| Trend    |          |          |                  | 0.88  |          |                  |      |         |                  | 0.78 |

*IL4* rs2243290 (IVS3-9C>T)

|          |          |          |                  |      |          |                  |      |         |                  |      |
|----------|----------|----------|------------------|------|----------|------------------|------|---------|------------------|------|
| CC       | 383 (72) | 332 (73) |                  |      | 264 (72) |                  |      | 23 (72) |                  |      |
| AC       | 129 (24) | 114 (25) | 1.02 (0.76-1.37) | 0.89 | 94 (26)  | 1.07 (0.78-1.47) | 0.66 | 9 (28)  | 1.09 (0.48-2.47) | 0.83 |
| AA       | 22 (4)   | 9 (2)    | 0.51 (0.23-1.13) | 0.10 | 7 (2)    | 0.51 (0.21-1.24) | 0.14 | 0 (0)   |                  |      |
| AC or AA | 151 (28) | 123 (27) | 0.95 (0.72-1.27) | 0.74 | 101 (28) | 1.00 (0.74-1.35) | 1.00 | 9 (28)  | 0.95 (0.42-2.14) | 0.89 |
| Trend    |          |          |                  | 0.39 |          |                  |      |         |                  | 0.60 |

*IL4* rs2243268 (IVS2-1443A>C)

|          |          |          |                  |      |          |                  |      |         |                  |      |
|----------|----------|----------|------------------|------|----------|------------------|------|---------|------------------|------|
| AA       | 383 (72) | 334 (74) |                  |      | 267 (73) |                  |      | 23 (72) |                  |      |
| AC       | 131 (25) | 110 (24) | 0.96 (0.71-1.29) | 0.78 | 90 (25)  | 0.99 (0.72-1.36) | 0.96 | 9 (28)  | 1.09 (0.48-2.46) | 0.84 |
| CC       | 20 (4)   | 9 (2)    | 0.57 (0.25-1.30) | 0.18 | 7 (2)    | 0.57 (0.23-1.38) | 0.21 | 0 (0)   |                  |      |
| AC or CC | 151 (28) | 119 (26) | 0.91 (0.69-1.21) | 0.53 | 97 (27)  | 0.94 (0.69-1.27) | 0.69 | 9 (28)  | 0.96 (0.43-2.16) | 0.92 |
| Trend    |          |          |                  | 0.33 |          |                  |      |         |                  | 0.46 |

*IL10* rs3024509 (IVS3-58T>C)

|          |          |          |                  |      |          |                  |      |         |  |  |
|----------|----------|----------|------------------|------|----------|------------------|------|---------|--|--|
| TT       | 459 (86) | 400 (88) |                  |      | 320 (87) |                  |      | 29 (88) |  |  |
| CT       | 71 (13)  | 56 (12)  | 0.89 (0.61-1.29) | 0.53 | 45 (12)  | 0.88 (0.59-1.32) | 0.54 | 4 (12)  |  |  |
| CC       | 3 (1)    | 1 (0)    |                  |      | 1 (1)    |                  |      |         |  |  |
| CT or CC | 74 (14)  | 57 (12)  | 0.86 (0.59-1.25) | 0.44 | 46 (13)  | 0.86 (0.58-1.28) | 0.47 | 4 (12)  |  |  |

*IL10* rs3024496 (Ex5+210T>C)

|          |          |          |                  |              |          |                  |              |  |         |                  |      |
|----------|----------|----------|------------------|--------------|----------|------------------|--------------|--|---------|------------------|------|
| TT       | 170 (32) | 125 (27) |                  |              | 97 (27)  |                  |              |  | 9 (27)  |                  |      |
| CT       | 271 (51) | 231 (51) | 1.15 (0.86-1.54) | 0.35         | 185 (51) | 1.20 (0.88-1.64) | 0.26         |  | 17 (52) | 1.19 (0.51-2.73) | 0.69 |
| CC       | 88 (17)  | 101 (22) | 1.55 (1.07-2.24) | <b>0.021</b> | 84 (23)  | 1.67 (1.13-2.47) | <b>0.011</b> |  | 7 (21)  | 1.51 (0.54-4.22) | 0.43 |
| CT or CC | 359 (68) | 332 (73) | 1.25 (0.95-1.65) | 0.12         | 269 (74) | 1.31 (0.98-1.77) | 0.072        |  | 24 (73) | 1.27 (0.57-2.79) | 0.56 |
| Trend    |          |          |                  | <b>0.024</b> |          |                  | <b>0.012</b> |  |         |                  | 0.44 |

*IL10* rs3024491 (IVS1-286G>T)

|          |          |          |                  |              |          |                  |              |  |         |                  |      |
|----------|----------|----------|------------------|--------------|----------|------------------|--------------|--|---------|------------------|------|
| GG       | 177 (33) | 130 (29) |                  |              | 99 (27)  |                  |              |  | 10 (30) |                  |      |
| GT       | 269 (50) | 226 (50) | 1.15 (0.86-1.53) | 0.36         | 183 (50) | 1.22 (0.89-1.67) | 0.21         |  | 16 (48) | 1.08 (0.47-2.45) | 0.86 |
| TT       | 87 (16)  | 99 (22)  | 1.54 (1.07-2.23) | <b>0.022</b> | 82 (23)  | 1.67 (1.13-2.48) | <b>0.01</b>  |  | 7 (21)  | 1.48 (0.54-4.07) | 0.45 |
| GT or TT | 356 (67) | 325 (71) | 1.24 (0.94-1.63) | 0.12         | 265 (73) | 1.33 (0.99-1.79) | 0.057        |  | 23 (70) | 1.17 (0.54-2.54) | 0.69 |
| Trend    |          |          |                  | <b>0.026</b> |          |                  | <b>0.011</b> |  |         |                  | 0.48 |

*IL10RA* rs9610 (Ex7-109A>G)

|          |          |          |                  |      |          |                  |      |  |         |                  |      |
|----------|----------|----------|------------------|------|----------|------------------|------|--|---------|------------------|------|
| GG       | 172 (30) | 154 (32) |                  |      | 118 (31) |                  |      |  | 13 (37) |                  |      |
| AG       | 267 (47) | 224 (47) | 0.97 (0.73-1.28) | 0.82 | 187 (49) | 1.06 (0.78-1.43) | 0.71 |  | 11 (31) | 0.56 (0.24-1.29) | 0.17 |
| AA       | 131 (23) | 102 (21) | 0.88 (0.62-1.23) | 0.44 | 77 (20)  | 0.88 (0.61-1.27) | 0.49 |  | 11 (31) | 1.12 (0.48-2.59) | 0.80 |
| AG or AA | 398 (70) | 326 (68) | 0.94 (0.72-1.22) | 0.63 | 264 (69) | 1.00 (0.75-1.33) | 0.99 |  | 22 (63) | 0.75 (0.37-1.52) | 0.42 |
| Trend    |          |          |                  | 0.46 |          |                  | 0.55 |  |         |                  | 0.90 |

*IL13* rs20541 (Ex4+98A>G)

|          |          |          |                  |      |          |                  |      |  |         |                  |      |
|----------|----------|----------|------------------|------|----------|------------------|------|--|---------|------------------|------|
| GG       | 347 (64) | 290 (63) |                  |      | 230 (63) |                  |      |  | 21 (64) |                  |      |
| AG       | 176 (32) | 156 (34) | 1.07 (0.82-1.40) | 0.61 | 125 (34) | 1.08 (0.81-1.43) | 0.61 |  | 10 (30) | 0.97 (0.45-2.12) | 0.95 |
| AA       | 19 (4)   | 16 (3)   | 0.94 (0.47-1.87) | 0.86 | 13 (4)   | 0.96 (0.46-1.99) | 0.92 |  | 2 (6)   |                  |      |
| AG or AA | 195 (36) | 172 (37) | 1.06 (0.82-1.37) | 0.66 | 138 (38) | 1.06 (0.81-1.40) | 0.66 |  | 12 (36) | 1.05 (0.50-2.18) | 0.90 |
| Trend    |          |          |                  | 0.77 |          |                  | 0.75 |  |         |                  |      |

*IL13* rs1800925 (-1069C>T)

|          |          |          |                  |      |          |                  |      |  |         |                  |      |
|----------|----------|----------|------------------|------|----------|------------------|------|--|---------|------------------|------|
| CC       | 368 (63) | 292 (59) |                  |      | 234 (59) |                  |      |  | 24 (63) |                  |      |
| CT       | 195 (33) | 184 (37) | 1.20 (0.93-1.54) | 0.17 | 148 (37) | 1.21 (0.92-1.58) | 0.17 |  | 10 (26) | 0.76 (0.35-1.63) | 0.48 |
| TT       | 20 (3)   | 22 (4)   | 1.40 (0.75-2.64) | 0.29 | 13 (3)   | 1.05 (0.51-2.17) | 0.89 |  | 4 (11)  |                  |      |
| CT or TT | 215 (37) | 206 (41) | 1.21 (0.95-1.56) | 0.12 | 161 (41) | 1.19 (0.92-1.55) | 0.19 |  | 14 (37) | 0.96 (0.48-1.91) | 0.91 |
| Trend    |          |          |                  | 0.11 |          |                  | 0.26 |  |         |                  |      |

|                                    |          |          |                  |      |          |                  |      |         |                   |              |
|------------------------------------|----------|----------|------------------|------|----------|------------------|------|---------|-------------------|--------------|
| <i>IL13</i> rs1295686 (IVS3-24T>C) |          |          |                  |      |          |                  |      |         |                   |              |
| CC                                 | 321 (60) | 272 (59) |                  |      | 218 (59) |                  |      |         | 19 (58)           |              |
| CT                                 | 185 (35) | 165 (36) | 1.08 (0.82-1.41) | 0.58 | 133 (36) | 1.09 (0.82-1.45) | 0.55 | 12 (36) | 1.06 (0.50-2.27)  | 0.88         |
| TT                                 | 27 (5)   | 21 (5)   | 0.88 (0.47-1.65) | 0.69 | 16 (4)   | 0.89 (0.45-1.77) | 0.74 | 2 (6)   |                   |              |
| CT or TT                           | 212 (40) | 186 (41) | 1.06 (0.81-1.37) | 0.68 | 149 (41) | 1.07 (0.81-1.41) | 0.63 | 14 (42) | 1.05 (0.50-2.19)  | 0.90         |
| Trend                              |          |          |                  | 0.87 |          |                  | 0.80 |         |                   |              |
| <i>JAK3</i> rs3008 Ex23+291T>C     |          |          |                  |      |          |                  |      |         |                   |              |
| TT                                 | 157 (29) | 129 (28) |                  |      | 109 (30) |                  |      | 3 (9)   |                   |              |
| CT                                 | 283 (53) | 242 (53) | 1.05 (0.78-1.41) | 0.74 | 192 (52) | 0.99 (0.73-1.35) | 0.96 | 23 (70) | 4.28 (1.26-14.51) | <b>0.02</b>  |
| CC                                 | 95 (18)  | 85 (19)  | 1.10 (0.75-1.60) | 0.63 | 65 (18)  | 1.01 (0.67-1.51) | 0.96 | 7 (21)  | 3.59 (0.90-14.32) | 0.07         |
| CT or CC                           | 378 (71) | 327 (72) | 1.06 (0.80-1.40) | 0.67 | 257 (70) | 1.00 (0.74-1.34) | 0.98 | 30 (91) | 4.10 (1.23-13.67) | <b>0.021</b> |
| Trend                              |          |          |                  | 0.62 |          |                  | 0.98 |         |                   | 0.07         |
| <i>CTLA4</i> rs231775 (Ex1-61A>G)  |          |          |                  |      |          |                  |      |         |                   |              |
| AA                                 | 217 (41) | 176 (38) |                  |      | 140 (38) |                  |      | 11 (33) |                   |              |
| AG                                 | 227 (43) | 217 (47) | 1.17 (0.89-1.54) | 0.26 | 175 (48) | 1.19 (0.89-1.60) | 0.23 | 16 (48) | 1.34 (0.61-2.96)  | 0.47         |
| GG                                 | 90 (17)  | 65 (14)  | 0.90 (0.62-1.32) | 0.61 | 52 (14)  | 0.91 (0.60-1.36) | 0.63 | 6 (18)  | 1.39 (0.50-3.90)  | 0.53         |
| AG or GG                           | 317 (59) | 282 (62) | 1.10 (0.85-1.42) | 0.48 | 227 (62) | 1.11 (0.85-1.46) | 0.45 | 22 (67) | 1.35 (0.64-2.86)  | 0.43         |
| Trend                              |          |          |                  | 0.97 |          |                  | 1.00 |         |                   | 0.46         |

\* Odds ratios adjusted for age and race. Further adjustment for family history yielded similar results.

§ Odds ratio not given for cells with less than 5 subjects.
