# Supplementary material
Source: PubMed Central journal article supplement (PMC1895277)
Supplement: blood_2005-10-4160_4.pdf [file blood_2005-10-4160_4.pdf]

| Gene name<br>SNP database ID<br>(nucleotide change) | Diffuse large B-cell lymphoma |                |                        |             | Follicular     |                        |              |
|-----------------------------------------------------|-------------------------------|----------------|------------------------|-------------|----------------|------------------------|--------------|
|                                                     | Controls<br>n (%)             | Cases<br>n (%) | Odds ratio<br>(95% CI) | P-<br>Value | Cases<br>n (%) | Odds ratio<br>(95% CI) | P-<br>Value  |
| <b>Th1 genes</b>                                    |                               |                |                        |             |                |                        |              |
| <i>IFNG</i> rs1861494 (IVS3+284G>A)                 |                               |                |                        |             |                |                        |              |
| AA                                                  | 275 (51)                      | 82 (56)        |                        |             | 58 (55)        |                        |              |
| AG                                                  | 210 (39)                      | 54 (37)        | 0.84 (0.57-1.25)       | 0.39        | 33 (31)        | 0.70 (0.44-1.12)       | 0.14         |
| GG                                                  | 50 (9)                        | 11 (7)         | 0.73 (0.36-1.48)       | 0.39        | 14 (13)        | 1.37 (0.70-2.68)       | 0.35         |
| AG or GG                                            | 260 (49)                      | 65 (44)        | 0.82 (0.57-1.19)       | 0.30        | 47 (45)        | 0.82 (0.54-1.26)       | 0.37         |
| Trend                                               |                               |                |                        | 0.27        |                |                        | 0.96         |
| <i>IFNG</i> rs2069705 (-1615C>T)                    |                               |                |                        |             |                |                        |              |
| TT                                                  | 234 (44)                      | 70 (48)        |                        |             | 49 (47)        |                        |              |
| CT                                                  | 233 (44)                      | 60 (41)        | 0.85 (0.57-1.25)       | 0.41        | 41 (39)        | 0.82 (0.52-1.30)       | 0.40         |
| CC                                                  | 65 (12)                       | 16 (11)        | 0.84 (0.46-1.56)       | 0.59        | 15 (14)        | 1.17 (0.61-2.25)       | 0.63         |
| CT or CC                                            | 298 (56)                      | 76 (52)        | 0.85 (0.58-1.22)       | 0.38        | 56 (53)        | 0.89 (0.58-1.36)       | 0.60         |
| Trend                                               |                               |                |                        | 0.43        |                |                        | 1.00         |
| <i>IFNGR1</i> rs3799488 (IVS6-4G>A)                 |                               |                |                        |             |                |                        |              |
| AA                                                  | 413 (77)                      | 113 (78)       |                        |             | 91 (87)        |                        |              |
| AG                                                  | 114 (21)                      | 29 (20)        | 0.92 (0.58-1.47)       | 0.74        | 12 (11)        | 0.48 (0.25-0.91)       | <b>0.025</b> |
| GG                                                  | 8 (2)                         |                |                        |             | 2 (2)          |                        |              |
| AG or GG                                            | 122 (23)                      | 32 (22)        | 0.95 (0.61-1.49)       | 0.83        | 14 (13)        | 0.52 (0.29-0.96)       | <b>0.036</b> |
| <i>IFNGR2</i> rs2070385 (Q64R Ex2-16A>G)            |                               |                |                        |             |                |                        |              |
| AA                                                  | 436 (77)                      | 119 (77)       |                        |             | 86 (78)        |                        |              |
| AG                                                  | 120 (21)                      | 35 (23)        | 1.09 (0.71-1.68)       | 0.70        | 22 (20)        | 0.99 (0.59-1.65)       | 0.96         |
| GG                                                  | 11 (2)                        | 1 (0)          |                        |             | 2 (2)          |                        |              |
| AG or GG                                            | 131 (23)                      | 36 (23)        | 1.04 (0.68-1.59)       | 0.86        | 24 (22)        | 1.00 (0.61-1.66)       | 0.99         |
| <i>IFNGR2</i> rs1059293 (Ex7-128C>T)                |                               |                |                        |             |                |                        |              |
| CC                                                  | 173 (32)                      | 46 (31)        |                        |             | 29 (28)        |                        |              |
| CT                                                  | 252 (47)                      | 67 (46)        | 1.00 (0.66-1.53)       | 0.99        | 52 (50)        | 1.25 (0.76-2.05)       | 0.38         |
| TT                                                  | 110 (21)                      | 34 (23)        | 1.24 (0.74-2.07)       | 0.41        | 24 (23)        | 1.45 (0.79-2.64)       | 0.23         |
| CT or TT                                            | 362 (68)                      | 101 (69)       | 1.07 (0.72-1.59)       | 0.73        | 76 (72)        | 1.30 (0.82-2.08)       | 0.27         |
| Trend                                               |                               |                |                        | 0.45        |                |                        | 0.22         |
| <i>IL2</i> rs2069762 (IVS1-100G>T)                  |                               |                |                        |             |                |                        |              |
| TT                                                  | 296 (51)                      | 86 (55)        |                        |             | 49 (42)        |                        |              |
| GT                                                  | 226 (39)                      | 55 (35)        | 0.82 (0.56-1.20)       | 0.31        | 56 (48)        | 1.47 (0.96-2.24)       | 0.078        |
| GG                                                  | 53 (9)                        | 16 (10)        | 0.99 (0.54-1.82)       | 0.97        | 12 (10)        | 1.33 (0.66-2.69)       | 0.43         |
| GT or GG                                            | 279 (49)                      | 71 (45)        | 0.85 (0.60-1.22)       | 0.38        | 68 (58)        | 1.44 (0.96-2.16)       | 0.079        |
| Trend                                               |                               |                |                        | 0.58        |                |                        | 0.14         |
| <i>IL7R</i> rs1494555 (Ex4+33G>A)                   |                               |                |                        |             |                |                        |              |
| AA                                                  | 245 (46)                      | 67 (47)        |                        |             | 52 (50)        |                        |              |
| AG                                                  | 220 (41)                      | 67 (47)        | 1.09 (0.74-1.61)       | 0.65        | 41 (39)        | 0.86 (0.55-1.35)       | 0.51         |
| GG                                                  | 67 (13)                       | 10 (7)         | 0.55 (0.27-1.13)       | 0.10        | 11 (11)        | 0.77 (0.38-1.58)       | 0.48         |
| AG or GG                                            | 287 (54)                      | 77 (53)        | 0.97 (0.67-1.41)       | 0.88        | 52 (50)        | 0.84 (0.55-1.29)       | 0.42         |
| Trend                                               |                               |                |                        | 0.32        |                |                        | 0.40         |

|                                      |          |                    |                  |       |         |                  |       |
|--------------------------------------|----------|--------------------|------------------|-------|---------|------------------|-------|
| <i>IL12A</i> rs568408 (Ex7+277A>G)   |          |                    |                  |       |         |                  |       |
| GG                                   | 423 (73) | 107 (69)           |                  |       | 87 (78) |                  |       |
| AG                                   | 141 (24) | 43 (28)            | 1.23 (0.82-1.85) | 0.32  | 25 (22) | 0.89 (0.55-1.45) | 0.65  |
| AA                                   | 18 (3)   | 6 (4)              | 1.51 (0.58-3.96) | 0.40  | 0 (0)   |                  | 0.98  |
| AG or AA                             | 159 (27) | 49 (31)            | 1.26 (0.85-1.86) | 0.24  | 25 (22) | 0.80 (0.49-1.29) | 0.36  |
| Trend                                |          |                    |                  | 0.22  |         |                  |       |
| <i>IL12A</i> rs582054 (IVS2-798A>T)  |          |                    |                  |       |         |                  |       |
| TT                                   | 171 (32) | 44 (30)            |                  |       | 30 (29) |                  |       |
| AT                                   | 257 (48) | 75 (51)            | 1.12 (0.74-1.71) | 0.59  | 45 (43) | 1.04 (0.62-1.72) | 0.89  |
| AA                                   | 106 (20) | 28 (19)            | 0.99 (0.58-1.70) | 0.98  | 30 (29) | 1.69 (0.95-2.99) | 0.073 |
| AT or AA                             | 363 (68) | 103 (70)           | 1.09 (0.73-1.62) | 0.69  | 75 (71) | 1.22 (0.77-1.95) | 0.40  |
| Trend                                |          |                    |                  | 0.94  |         |                  | 0.087 |
| <i>IL12B</i> rs3212227 (Ex8+159A>C)  |          |                    |                  |       |         |                  |       |
| AA                                   | 368 (65) | 96 (64)            |                  |       | 67 (61) |                  |       |
| AC                                   | 178 (31) | 48 (32)            | 1.03 (0.70-1.53) | 0.88  | 36 (33) | 1.14 (0.73-1.78) | 0.57  |
| CC                                   | 23 (4)   | 7 (5)              | 1.18 (0.49-2.86) | 0.71  | 6 (6)   | 1.45 (0.56-3.75) | 0.44  |
| AC or CC                             | 201 (35) | 55 (36)            | 1.05 (0.72-1.53) | 0.80  | 42 (39) | 1.17 (0.77-1.80) | 0.46  |
| Trend                                |          |                    |                  | 0.74  |         |                  | 0.39  |
| <i>IL15</i> rs10833 (Ex9-66T>C)      |          |                    |                  |       |         |                  |       |
| CC                                   | 236 (44) | 64 (44)            |                  |       | 43 (41) |                  |       |
| CT                                   | 230 (43) | 65 (44)            | 0.99 (0.67-1.48) | 0.98  | 46 (44) | 1.02 (0.64-1.62) | 0.93  |
| TT                                   | 69 (13)  | 18 (12)            | 0.91 (0.50-1.65) | 0.76  | 16 (15) | 1.17 (0.62-2.23) | 0.63  |
| CT or TT                             | 299 (56) | 83 (56)            | 0.98 (0.67-1.42) | 0.90  | 62 (59) | 1.06 (0.68-1.63) | 0.81  |
| Trend                                |          |                    |                  | 0.80  |         |                  | 0.68  |
| <i>IL15RA</i> rs2296135 (Ex8-361T>G) |          |                    |                  |       |         |                  |       |
| GG                                   | 151 (28) | 36 (24)            |                  |       | 24 (23) |                  |       |
| GT                                   | 250 (47) | 70 (48)            | 1.13 (0.72-1.79) | 0.59  | 53 (51) | 1.29 (0.76-2.20) | 0.34  |
| TT                                   | 130 (24) | 41 (28)            | 1.28 (0.77-2.14) | 0.34  | 26 (25) | 1.22 (0.66-2.25) | 0.53  |
| GT or TT                             | 380 (72) | 111 (76)           | 1.18 (0.77-1.81) | 0.44  | 79 (77) | 1.27 (0.77-2.09) | 0.35  |
| Trend                                |          |                    |                  | 0.34  |         |                  | 0.52  |
| <i>LTA</i> rs909253 (IVS1+90G>A)     |          |                    |                  |       |         |                  |       |
| AA                                   | 274 (46) | 75 (47)            |                  |       | 60 (50) |                  |       |
| AG                                   | 254 (43) | 68 (42)            | 0.98 (0.67-1.42) | 0.90  | 46 (39) | 0.83 (0.54-1.27) | 0.40  |
| GG                                   | 65 (11)  | 18 (11)            | 1.06 (0.59-1.90) | 0.85  | 13 (11) | 0.96 (0.49-1.86) | 0.90  |
| AG or GG                             | 319 (54) | 86 (53)            | 0.99 (0.70-1.41) | 0.97  | 59 (50) | 0.86 (0.58-1.28) | 0.45  |
| Trend                                |          |                    |                  | 0.94  |         |                  | 0.61  |
| <i>LTA</i> rs2239704 (Ex1+49C>A)     |          |                    |                  |       |         |                  |       |
| CC                                   | 186 (37) | 50 (39)            |                  |       | 42 (42) |                  |       |
| AC                                   | 226 (45) | 56 (44)            | 0.91 (0.59-1.40) | 0.68  | 41 (41) | 0.76 (0.47-1.23) | 0.26  |
| AA                                   | 87 (17)  | 21 (17)            | 0.90 (0.51-1.59) | 0.71  | 16 (16) | 0.84 (0.44-1.58) | 0.58  |
| AC or AA                             | 313 (63) | 77 (61)            | 0.91 (0.61-1.36) | 0.64  | 57 (58) | 0.78 (0.50-1.22) | 0.27  |
| Trend                                |          |                    |                  | 0.66  |         |                  | 0.42  |
| <i>TNF</i> rs1800629 (-308G>A)       |          |                    |                  |       |         |                  |       |
| GG                                   | 430 (72) | 106 (66)           |                  |       | 87 (73) |                  |       |
| AG                                   | 146 (25) | 51 (32)            | 1.39 (0.95-2.05) | 0.094 | 26 (22) | 0.91 (0.56-1.48) | 0.71  |
| AA                                   | 19 (3)   | 3 (2) <sup>§</sup> |                  |       | 6 (5)   | 1.51 (0.58-3.93) | 0.40  |
| AG or AA                             | 165 (28) | 54 (34)            | 1.30 (0.89-1.90) | 0.17  | 32 (27) | 0.98 (0.63-1.54) | 0.95  |
| Trend                                |          |                    |                  |       |         |                  | 0.80  |

|                               |          |          |                  |      |         |                  |      |
|-------------------------------|----------|----------|------------------|------|---------|------------------|------|
| <i>TNF</i> rs361525 (-417A>G) |          |          |                  |      |         |                  |      |
| GG                            | 492 (88) | 134 (89) |                  |      | 92 (85) |                  |      |
| AG                            | 60 (11)  | 15 (10)  | 0.89 (0.49-1.63) | 0.71 | 15 (14) | 1.31 (0.71-2.43) | 0.39 |
| AA                            | 5 (1)    | 1 (1)    |                  |      | 1 (1)   |                  |      |
| AG or AA                      | 65 (12)  | 16 (11)  | 0.88 (0.49-1.57) | 0.66 | 16 (15) | 1.29 (0.71-2.34) | 0.41 |

|                                 |          |          |                  |      |         |                  |      |
|---------------------------------|----------|----------|------------------|------|---------|------------------|------|
| <i>TNF</i> rs1799724 (-1036C>T) |          |          |                  |      |         |                  |      |
| CC                              | 431 (78) | 118 (78) |                  |      | 87 (80) |                  |      |
| CT                              | 119 (21) | 31 (21)  | 0.95 (0.60-1.48) | 0.81 | 21 (19) | 0.90 (0.54-1.52) | 0.70 |
| TT                              | 6 (1)    | 2 (1)    |                  |      | 1 (1)   |                  |      |
| CT or TT                        | 125 (22) | 33 (22)  | 0.96 (0.62-1.49) | 0.87 | 22 (20) | 0.90 (0.54-1.50) | 0.69 |

---

### Th2 genes

---

|                                |          |          |                  |      |         |                  |      |
|--------------------------------|----------|----------|------------------|------|---------|------------------|------|
| <i>IL4</i> rs2243250 (-588C>T) |          |          |                  |      |         |                  |      |
| CC                             | 413 (71) | 109 (69) |                  |      | 75 (68) |                  |      |
| CT                             | 140 (24) | 44 (28)  | 1.24 (0.83-1.86) | 0.30 | 34 (31) | 1.39 (0.88-2.19) | 0.16 |
| TT                             | 26 (4)   | 4 (3)    |                  |      | 2 (1)   |                  |      |
| CT or TT                       | 166 (29) | 48 (31)  | 1.16 (0.78-1.72) | 0.45 | 36 (32) | 1.27 (0.81-1.99) | 0.29 |

|                                 |          |          |                  |       |         |                  |      |
|---------------------------------|----------|----------|------------------|-------|---------|------------------|------|
| <i>IL4</i> rs2243248 (-1098T>G) |          |          |                  |       |         |                  |      |
| TT                              | 508 (88) | 129 (83) |                  |       | 97 (88) |                  |      |
| GT                              | 66 (11)  | 26 (17)  | 1.64 (1.00-2.71) | 0.052 | 13 (12) | 1.10 (0.58-2.09) | 0.78 |
| GG                              | 4 (1)    | 1 (0)    |                  |       | 0 (0)   |                  |      |
| GT or GG                        | 70 (12)  | 27 (17)  | 1.61 (0.98-2.64) | 0.058 | 13 (12) | 1.03 (0.54-1.95) | 0.93 |

|                                   |          |          |                  |      |         |                  |       |
|-----------------------------------|----------|----------|------------------|------|---------|------------------|-------|
| <i>IL4</i> rs2070874 (Ex1-168C>T) |          |          |                  |      |         |                  |       |
| CC                                | 419 (73) | 108 (70) |                  |      | 74 (68) |                  |       |
| CT                                | 130 (23) | 42 (27)  | 1.31 (0.87-1.98) | 0.20 | 34 (31) | 1.53 (0.97-2.43) | 0.068 |
| TT                                | 26 (4)   | 4 (3)    |                  |      | 1 (1)   |                  |       |
| CT or TT                          | 156 (27) | 46 (30)  | 1.22 (0.82-1.81) | 0.34 | 35 (32) | 1.34 (0.85-2.10) | 0.21  |

|                                  |          |          |                  |      |         |                  |      |
|----------------------------------|----------|----------|------------------|------|---------|------------------|------|
| <i>IL4</i> rs2243290 (IVS3-9C>A) |          |          |                  |      |         |                  |      |
| CC                               | 383 (72) | 103 (71) |                  |      | 72 (69) |                  |      |
| AC                               | 129 (24) | 40 (27)  | 1.17 (0.77-1.78) | 0.47 | 31 (30) | 1.29 (0.80-2.06) | 0.30 |
| AA                               | 26 (4)   | 3 (2)    |                  |      | 1 (1)   |                  |      |
| AC or AA                         | 151 (28) | 43 (29)  | 1.09 (0.72-1.64) | 0.68 | 32 (31) | 1.16 (0.73-1.86) | 0.52 |

|                                     |          |          |                 |      |         |                  |      |
|-------------------------------------|----------|----------|-----------------|------|---------|------------------|------|
| <i>IL4</i> rs2243268 (IVS2-1443A>C) |          |          |                 |      |         |                  |      |
| AA                                  | 383 (72) | 104 (71) |                 |      | 73 (70) |                  |      |
| AC                                  | 131 (25) | 39 (27)  | 1.11 (0.73-1.7) | 0.63 | 31 (30) | 1.24 (0.77-1.99) | 0.37 |
| CC                                  | 19 (3)   | 3 (2)    |                 |      | 1 (0)   |                  |      |
| AC or CC                            | 151 (28) | 42 (29)  | 1.06 (0.7-1.59) | 0.80 | 32 (30) | 1.14 (0.71-1.81) | 0.59 |

|                                   |          |         |                  |      |         |                  |      |
|-----------------------------------|----------|---------|------------------|------|---------|------------------|------|
| <i>IL4R</i> rs2107356 (-28120T>C) |          |         |                  |      |         |                  |      |
| CC                                | 200 (36) | 51 (36) |                  |      | 34 (32) |                  |      |
| CT                                | 258 (47) | 65 (45) | 0.96 (0.64-1.46) | 0.86 | 59 (56) | 1.29 (0.81-2.08) | 0.28 |
| TT                                | 95 (17)  | 27 (19) | 1.07 (0.63-1.82) | 0.80 | 13 (12) | 0.75 (0.38-1.51) | 0.43 |
| CT or TT                          | 353 (64) | 92 (64) | 0.99 (0.67-1.47) | 0.97 | 72 (68) | 1.15 (0.73-1.81) | 0.55 |
| Trend                             |          |         |                  | 0.86 |         |                  | 0.73 |

|                                |          |          |                  |      |         |                  |      |
|--------------------------------|----------|----------|------------------|------|---------|------------------|------|
| <i>IL6</i> rs1800795 (-174G>C) |          |          |                  |      |         |                  |      |
| GG                             | 241 (41) | 57 (36)  |                  |      | 51 (43) |                  |      |
| CG                             | 264 (45) | 73 (46)  | 1.12 (0.75-1.66) | 0.58 | 53 (45) | 0.87 (0.57-1.34) | 0.54 |
| CC                             | 85 (14)  | 28 (18)  | 1.37 (0.81-2.31) | 0.24 | 15 (13) | 0.78 (0.42-1.48) | 0.45 |
| CG or CC                       | 349 (59) | 101 (64) | 1.18 (0.81-1.71) | 0.39 | 68 (57) | 0.85 (0.57-1.28) | 0.44 |
| Trend                          |          |          |                  | 0.25 |         |                  | 0.40 |

|                                     |          |          |                  |              |         |                  |       |
|-------------------------------------|----------|----------|------------------|--------------|---------|------------------|-------|
| <i>IL6</i> rs1800797 (-598G>A)      |          |          |                  |              |         |                  |       |
| GG                                  | 233 (41) | 54 (35)  |                  |              | 50 (45) |                  |       |
| AG                                  | 254 (44) | 77 (50)  | 1.25 (0.84-1.86) | 0.27         | 48 (43) | 0.83 (0.53-1.28) | 0.39  |
| AA                                  | 84 (15)  | 23 (15)  | 1.13 (0.65-1.97) | 0.66         | 14 (13) | 0.72 (0.38-1.38) | 0.32  |
| AG or AA                            | 338 (59) | 100 (65) | 1.22 (0.84-1.78) | 0.30         | 62 (55) | 0.80 (0.53-1.21) | 0.29  |
| Trend                               |          |          |                  | 0.47         |         |                  | 0.26  |
| <i>IL10</i> rs3024509 (IVS3-58T>C)  |          |          |                  |              |         |                  |       |
| TT                                  | 459 (86) | 128 (88) |                  |              | 93 (89) |                  |       |
| CT                                  | 71 (13)  | 18 (12)  | 0.92 (0.53-1.61) | 0.77         | 12 (11) | 0.80 (0.42-1.55) | 0.51  |
| CC                                  | 3 (1)    | 0 (0)    |                  |              | 0 (0)   |                  |       |
| CT or CC                            | 74 (14)  | 18 (12)  | 0.87 (0.50-1.52) | 0.63         | 12 (11) | 0.77 (0.40-1.48) | 0.43  |
| <i>IL10</i> rs3024496 (Ex5+210T>C)  |          |          |                  |              |         |                  |       |
| TT                                  | 170 (32) | 41 (28)  |                  |              | 28 (27) |                  |       |
| CT                                  | 271 (51) | 70 (48)  | 1.07 (0.69-1.65) | 0.76         | 56 (53) | 1.28 (0.78-2.11) | 0.33  |
| CC                                  | 88 (17)  | 36 (24)  | 1.67 (0.99-2.80) | 0.054        | 21 (20) | 1.42 (0.76-2.67) | 0.27  |
| CT or CC                            | 359 (68) | 106 (72) | 1.22 (0.81-1.83) | 0.34         | 77 (73) | 1.32 (0.82-2.12) | 0.26  |
| Trend                               |          |          |                  | 0.072        |         |                  | 0.25  |
| <i>IL10</i> rs3024491 (IVS1-286G>T) |          |          |                  |              |         |                  |       |
| GG                                  | 177 (33) | 41 (28)  |                  |              | 29 (28) |                  |       |
| GT                                  | 269 (50) | 68 (47)  | 1.09 (0.71-1.69) | 0.69         | 55 (52) | 1.28 (0.78-2.09) | 0.34  |
| TT                                  | 87 (16)  | 36 (25)  | 1.76 (1.04-2.96) | <b>0.034</b> | 21 (20) | 1.44 (0.77-2.69) | 0.25  |
| GT or TT                            | 356 (67) | 104 (72) | 1.26 (0.84-1.89) | 0.27         | 76 (72) | 1.32 (0.82-2.11) | 0.25  |
| Trend                               |          |          |                  | <b>0.047</b> |         |                  | 0.23  |
| <i>IL10RA</i> rs9610 (Ex7-109A>G)   |          |          |                  |              |         |                  |       |
| GG                                  | 172 (30) | 47 (31)  |                  |              | 39 (35) |                  |       |
| AG                                  | 267 (47) | 76 (51)  | 1.05 (0.70-1.60) | 0.80         | 53 (48) | 0.91 (0.57-1.44) | 0.68  |
| AA                                  | 131 (23) | 27 (18)  | 0.77 (0.46-1.31) | 0.34         | 18 (16) | 0.62 (0.34-1.14) | 0.12  |
| AG or AA                            | 398 (70) | 103 (69) | 0.96 (0.65-1.42) | 0.85         | 71 (65) | 0.81 (0.53-1.25) | 0.34  |
| Trend                               |          |          |                  | 0.41         |         |                  | 0.14  |
| <i>IL13</i> rs20541 (Ex4+98A>G)     |          |          |                  |              |         |                  |       |
| GG                                  | 347 (64) | 89 (61)  |                  |              | 64 (62) |                  |       |
| AG                                  | 176 (32) | 55 (38)  | 1.24 (0.84-1.83) | 0.27         | 35 (34) | 1.10 (0.69-1.73) | 0.69  |
| AA                                  | 19 (4)   | 2 (1)    |                  |              | 5 (5)   | 1.30 (0.46-3.64) | 0.62  |
| AG or AA                            | 195 (36) | 57 (39)  | 1.15 (0.79-1.69) | 0.46         | 40 (38) | 1.12 (0.72-1.73) | 0.62  |
| Trend                               |          |          |                  |              |         |                  | 0.56  |
| <i>IL13</i> rs1800925 (-1069C>T)    |          |          |                  |              |         |                  |       |
| CC                                  | 368 (63) | 93 (60)  |                  |              | 63 (56) |                  |       |
| CT                                  | 195 (33) | 57 (37)  | 1.18 (0.81-1.72) | 0.38         | 46 (41) | 1.46 (0.96-2.23) | 0.079 |
| TT                                  | 20 (3)   | 6 (4)    | 1.32 (0.51-3.41) | 0.57         | 3 (3)   |                  |       |
| CT or TT                            | 215 (37) | 63 (40)  | 1.19 (0.83-1.72) | 0.34         | 49 (44) | 1.41 (0.93-2.13) | 0.11  |
| Trend                               |          |          |                  | 0.33         |         |                  | 0.20  |
| <i>IL13</i> rs1295686 (IVS3-24T>C)  |          |          |                  |              |         |                  |       |
| CC                                  | 321 (60) | 86 (59)  |                  |              | 63 (60) |                  |       |
| CT                                  | 185 (35) | 58 (39)  | 1.20 (0.82-1.76) | 0.36         | 35 (33) | 1.02 (0.65-1.61) | 0.93  |
| TT                                  | 27 (5)   | 3 (3)    |                  |              | 7 (7)   | 1.40 (0.55-3.59) | 0.48  |
| CT or TT                            | 212 (40) | 61 (42)  | 1.11 (0.76-1.63) | 0.58         | 42 (40) | 1.06 (0.69-1.65) | 0.79  |
| Trend                               |          |          |                  |              |         |                  | 0.63  |

|                                  |          |          |                  |      |         |                  |      |
|----------------------------------|----------|----------|------------------|------|---------|------------------|------|
| <i>JAK3</i> rs3008 (Ex23+291T>C) |          |          |                  |      |         |                  |      |
| TT                               | 157 (29) | 42 (29)  |                  |      | 32 (30) |                  |      |
| CT                               | 283 (53) | 70 (48)  | 0.94 (0.61-1.45) | 0.78 | 60 (57) | 1.09 (0.68-1.76) | 0.72 |
| CC                               | 95 (18)  | 34 (23)  | 1.34 (0.79-2.27) | 0.27 | 13 (12) | 0.68 (0.34-1.37) | 0.28 |
| CT or CC                         | 378 (71) | 104 (71) | 1.04 (0.69-1.56) | 0.85 | 73 (70) | 0.99 (0.62-1.56) | 0.95 |
| Trend                            |          |          |                  | 0.34 |         |                  | 0.41 |

---

**Th1/Th2**

---

|                                   |          |         |                  |              |         |                  |      |
|-----------------------------------|----------|---------|------------------|--------------|---------|------------------|------|
| <i>CTLA4</i> rs231775 (Ex1-61A>G) |          |         |                  |              |         |                  |      |
| AA                                | 217 (41) | 48 (33) |                  |              | 46 (44) |                  |      |
| AG                                | 227 (43) | 80 (54) | 1.55 (1.03-2.32) | <b>0.036</b> | 47 (45) | 0.98 (0.62-1.54) | 0.92 |
| GG                                | 90 (17)  | 19 (13) | 0.95 (0.53-1.71) | 0.87         | 12 (11) | 0.62 (0.31-1.23) | 0.17 |
| AG or GG                          | 317 (59) | 99 (67) | 1.38 (0.94-2.03) | 0.10         | 59 (56) | 0.88 (0.57-1.34) | 0.54 |
| Trend                             |          |         |                  | 0.57         |         |                  | 0.25 |

\* Odds ratios adjusted for age and race. Further adjustment for family history yielded similar results.

§ Odds ratio not given for cells with less than 5 subjects.
